# Supplementary material for: Are Urban Primary Health Care Centres in Bangladesh Prepared to Manage Non-communicable Diseases? A Mixed Methods Study
Source: Research Square preprint supplement (doi:10.21203/rs.3.rs-8439762/v1), 2026-02-10
Supplement: Supplementary file 1 [file 80d906aabd21d064303eb2ea.docx]

APPENDIX 1: Questions from Bangladesh Health Facility Survey used in analysis, and In-Depth and Key informant interviews used in Data collection

| **Health building blocks** | **Questions from Bangladesh Health Facility Survey** | **Questions from In-depth and Key Informant Interviews** |
| --- | --- | --- |
| Service Delivery | - Does this facility offer any of the following client services? Diagnosis or management of non-communicable diseases - Do providers in this facility diagnose and / or manage diabetes? - Do you have the national guidelinesfor the diagnosis and management of diabetes / cardio-vascular disease / hypertension available in this service area? - Do you have any other guidelines / protocol / manual for the diagnosis and management of diabetes / cardio-vascular disease / hypertension available in this service area? - Do providers in this facility diagnose and/or manage cardio-vascular diseases including coronary heart / diabetes / hypertension disease in patients? | - Are all patients screened for NCDs? If yes, which NCDs are they screened for? - If not, what factors determine the necessity to screen a patient for NCD? - Scene 1: Patient is screened and is not found to have any NCD, what happens next? If follow-up is advised, do they follow? Are family members counselled? - Scene 2: Patient is screened and is found to have an NCD, as well patient is an NCD what happens - next? If follow up is advised, do they follow? If yes, how often? Are family members counselled? Referral mechanism - Scene 3: Patient with Comorbidity, what happens next? If follow-up is advised, do they follow? and Referral mechanism - Are there any diagnostic services available in this clinic? If yes, which diagnostic services are available? Refer anywhere for tests? - Do you have any guidelines for service through your project especially when you treat NCD people? |
| Health workforce | - Have you received any in-service training, training updates or refresher training on topics specific to the diagnosis and/or management of diabetes/cardio-vascular disease/hypertension? - If yes, was the training, training update or refresher training within the past 24 or more than 24 months ago? | - Is manpower pertaining to NCD care recorded? If yes, how and who is responsible? - ·Existence of NCD training programmes: Participants – Who and from where? Topics? Who conducts, who funds? Basic and refresher? Frequency, Location – Centrally or periphery and Length of training? Incentives? Challenges in training? Existence of NCD control guidelines? |
| Access to drugs and equipment’s | Are any of the following medicines for the management of non-communicable diseases available in the facility/location today?   - Amlodipine Tablets(CCB for high blood pressure) - Atenolol (Beta-blocker, Angina/hypertension) - Captopril (Vaso-dilatation, cardiac hypertension) - Enalapril Capsule/Tablet (A.C.E Inhibitor - Losartan Potassium 25 mg, 50 MG, 100 mg Epinephrine Injection Frusemide (Diuretic) tablet/injection 40 mg - Thiazide Diuretic - Glibenclamide (Oral treatment - for type-2 diabetes) - Glucose Injectable Solution - Heparin injection - Insulin injections [anti diabetic] Isosorbide Dinitrate Tablet 10 Mg - Metformin Tablets 500 mg, 850 mg - Nifedipine tablets/capsules (CCB for high blood pressure) Simvastatin (high cholesterol) Aspirin tablets 75 mg - Gliclazide tablet, 80 mg Glycerine trinitrate tablet 2.6 mg - Glimepiride tablet (secrin) 1,2, 3,4 mg - Atovastatin tablet 10 mg, 20 mg - Rosuvastatin tablet 10 mg, 20 mg - Clopidogrel tablet 75 mg   I would like to know if the following items are available today in the main service area and are functioning:  ·   - Adult weighing scale - Stadiometer (or height rod) for measuring height and Measuring tape - Thermometer - Stethoscope - Manual BP apparatus - Digital BP apparatus | - NCD drugs and equipment storage-How? Where?   - Responsible person? - Examining expiry of NCD drugs and reagents   - How (temperature and its’ maintenance)?   - Who? Frequency? - What happens to expired drugs?   - Documentation?   - Accountability? - Distribution of drugs and reagents related to NCD-Who? How? Frequency? Accountability? - Documentation? Challenges in storing and distributing NCD drugs and reagents?   - If yes, what are they and how are they handled? |
| Health information system | No information related to NCD | - Are NCD patients or a risk of developing NCD patients, referral cases, follow up cases listed? Where, how, who is responsible? Whether these are kept or not? - Are drugs, reagents and equipment pertaining to NCD care recorded? If yes, how and who is responsible? If no, why not? - What is the flow of reporting, especially for NCD care? Existing reporting framework for NCD care? |
| Health financing | No information related to NCD | - How are the services, drugs and laboratory diagnostics paid for? - Who pays? - Flow of funds - How and what do patients pay for services - How do funds reach the centre – Flow of funds? |
| Leadership and governance | No information related to NCD | - Supervision visits? Who? If yes, what is supervised and how? Service? Equipment Calibration and storage? Frequency? Documentation – how? Who? Where? - Monitoring and supervision reports-Who? To Whom? Frequency? Templates? |

APPENDIX 2: Gender distribution across workforce

| **Centres with workforce managing NCD** | | **n = 66** | **%** | **95% CI** |
| --- | --- | --- | --- | --- |
| Diabetes | | 55 | 83.33 | 72.13 - 91.38 |
| Cardiovascular Disease | | 49 | 74.24 | 61.99 - 84.22 |
| **Distribution of the workforce across centres (diabetes)** | | **n = 221** | **%** | **95% CI** |
| Specialist | Female | 0 | 0 | 0.01 - 2.49 |
| Male | 2 | 0.90 | 0.11 - 3.23 |
| Medical officer | Female | 35 | 15.84 | 11.29 - 21.33 |
| Male | 1 | 0.045 | 0.01 - 2.49 |
| Paramedic | Female | 59 | 26.69 | 20.98 - 33.04 |
| Male | 2 | 0.90 | 0.11 - 3.23 |
| Nurse | Female | 1 | 0.045 | 0.01 - 2.49 |
| Male | 0 | 0 | 0.01 - 2.49 |
| Health Educator / Counsellor | Female | 2 | 0.90 | 0.11 - 3.23 |
| Male | 0 | 0 | 0.01 - 2.49 |
| Other clinical staff | Female | 1 | 0.045 | 0.01 - 2.49 |
| Male | 0 | 0 | 0.01 - 2.49 |
| **Distribution of the workforce across centres (CVD)** | | **n = 221** | **%** | **95% CI** |
| Specialist | Female | 1 | 0.045 | 0.01 - 2.49 |
| Male | 2 | 0.90 | 0.11 - 3.23 |
| Medical officer | Female | 32 | 14.48 | 10.12 - 19.82 |
| Male | 5 | 2.26 | 0.73 - 5.20 |
| Paramedic | Female | 59 | 26.69 | 20.98 - 33.04 |
| Male | 2 | 0.90 | 0.11 - 3.23 |
| Nurse | Female | 6 | 2.71 | 1 - 5.81 |
| Male | 0 | 0 | 0.01 - 2.49 |
| Health Educator / Counsellor | Female | 3 | 1.36 | 0.28 - 3.92 |
| Male | 0 | 0 | 0.01 - 2.49 |
| Other clinical staff | Female | 2 | 0.90 | 0.11 - 3.23 |
| Male | 0 | 0 | 0.01 - 2.49 |
| **Centres with staff who have received NCD training within last 2 years (from the date of the survey)** | | **n = 66** | **%** | **95% CI** |
| Diabetes | | 27 | 40.91 | 28.95 - 53.71 |
| CVD | | 12 | 18.18 | 9.76 - 29.61 |
| **Distribution of the workforce who received DM training across centres** | | **n = 221** | **%** | **95% CI** |
| Medical officer | Female | 7 | 3.18 | 1.28 – 6.42 |
| Male | 2 | 0.91 | 0.11 – 3.23 |
| Paramedic | Female | 19 | 8.60 | 5.26 – 13.10 |
| Male | 0 | 0 | 0.01 - 2.49 |
| Nurse | Female | 1 | 0.45 | 0.01 – 2.49 |
| Male | 0 | 0 | 0.01 - 2.49 |
| Health Educator / Counsellor | Female | 2 | 0.91 | 0.11 – 3.23 |
| Male | 0 | 0 | 0.01 - 2.49 |
| **Distribution of the workforce who received CVD training across centres** | | **n = 221** | **%** | **95% CI** |
| Specialist | Female | 1 | 0.45 | 0.01 – 2.49 |
| Male | 0 | 0 | 0.01 - 2.49 |
| Medical officer | Female | 1 | 0.45 | 0.01 – 2.49 |
| Male | 3 | 1.36 | 0.28 – 3.92 |
| Paramedic | Female | 7 | 3.18 | 1.28 – 6.42 |
| Male | 0 | 0 | 0.01 - 2.49 |
| Nurse | Female | 2 | 0.91 | 0.11 – 3.23 |
| Male | 0 | 0 | 0.01 - 2.49 |
| Health Educator / Counsellor | Female | 1 | 0.45 | 0.01 – 2.49 |
| Male | 0 | 0 | 0.01 - 2.49 |
